# Supplementary material for: Self-assembly of silver(i)-based high-energy metal–organic frameworks (HE-MOFs) at ambient temperature and pressure: synthesis, structure and superior explosive performance
Source: Royal Society of Chemistry journal article supplement (doi:10.1039/c7cc03869k), 2017-01-01
Supplement: c7cc03869k1.pdf [file c7cc03869k1.pdf]

Supporting Information

for

Self-assembly of silver(I)-based high-energy metal-organic frameworks (HE-MOFs) at ambient temperature and pressure: synthesis, structure and superior explosive performance

*Cheng Shen,<sup>a‡</sup> Yang Liu,<sup>a‡</sup> Zhong-qin Zhu,<sup>a</sup> Yuan-gang Xu<sup>a</sup> and Ming Lu<sup>\*a</sup>*

*(School of Chemical Engineering, Nanjing University of Science and Technology, Nanjing 210094, China)*

**Contents**

S2 Experimental Section

S3-4 X-ray crystallographic study

S5 Single crystal data for compound 1

S6 Single crystal data for compound 2

S7 Thermal decomposition

S8 Vibration spectroscopy

S9 Calculation of Detonation Properties

S10 References

<sup>a</sup> School of Chemical Engineering, Nanjing University of Science and Technology, Nanjing 210094, China. E-mail: luming@mail.njust.edu.cn; luming302@126.com

‡ These authors have equally contributed to this work

## EXPERIMENTAL SECTION

### Caution

Caution: Title compound is dangerous materials, explosions of which may occur in certain conditions. Although we had no difficulties on synthesizing and handing the compounds, proper safety precautions such as safety glasses, plastic spatulas and face shields must be used, especially when the experiments on a large scale.

### Materials and General Methods

K<sub>2</sub>DNMAF was synthesized according to a previously reported method<sup>1</sup>. Other commercially available reagents were used without further purification. The melting and decomposition (onset) points were measured on a differential scanning calorimeter (DSC, Mettler Toledo DSC823e) at a scan rate of 5 °C min<sup>-1</sup> in closed Al containers with a nitrogen flow of 50 mL min<sup>-1</sup>. In addition, thermogravimetric analysis (TGA) was carried out at a heating rate of 5 °C min<sup>-1</sup> on a Mettler Toledo TGA/SDTA851e instrument. The infrared (IR) spectra of solids were recorded using KBr pellets on a Thermo Nicolet iS10 spectrometer. Elemental analyses were carried out on a Vario EL III CHNOS elemental analyzer. The constant-volume combustion energies ( $\Delta_c U$ ) of compounds 1 and 2 were measured using a precise rotating-oxygen bomb calorimeter (Parr 6400, Parr Instrument Company, Moline Illinois, USA). Approximately 50 mg of the sample were pressed with a well-define amount of benzoic acid (calculated 250 mg, NIST Thermo chemical Standard 39j) to form a tablet to ensure better combustion. The procedure for a standardization test is exactly same as for testing an EMOF sample. The recorded data are the average of five single measurements.

**Synthesis of {Ag<sub>2</sub>(DNMAF)·(H<sub>2</sub>O)<sub>2</sub>}<sub>n</sub> (Compound 1).** K<sub>2</sub>DNMAF (0.0080 g, 0.0178 mmol) was dissolved in 3ml ions-free water, then AgNO<sub>3</sub> (0.018 g, 0.1068 mmol) was added at the room temperature and kept it in a 5 ml sealed glass vial. Yellow crystals (0.00786 g, 0.0126 mmol) were obtained after 24 hours (yield: 71%, based on K<sub>2</sub>DNMAF).

**Synthesis of {Ag<sub>2</sub>(DNMAF)}<sub>n</sub> (Compound 2).** K<sub>2</sub>DNMAF (0.0080 g, 0.0178 mmol) was dissolved in 3ml ions-free water, then added aqueous AgNO<sub>3</sub> (0.018 g, 0.1068 mmol) dropwise at 90 °C. The solution was kept at the 90 °C in 5 ml sealed glass vial. Yellow crystals (0.00788 g, 0.0134 mmol) were observed after 24 hours (yield: 75%, based on K<sub>2</sub>DNMAF).

### X-ray crystallographic study

An orange plate crystal 1 of dimensions  $0.26 \times 0.14 \times 0.13 \text{ mm}^3$ , an orange plate crystal 2 of dimensions  $0.24 \times 0.13 \times 0.12 \text{ mm}^3$  were performed on a Bruker Smart Apex II diffractometer with graphite-monochromated Mo K $\alpha$  radiation ( $\lambda = 0.71073 \text{ \AA}$ ) at 205 K and 173 K, respectively. Integration and scaling of intensity data were accomplished using the SAINT program<sup>2</sup>. The structures were solved by intrinsic using SHELXT2014 and refinement was carried out by a full-matrix least-squares technique using SHELXT2014<sup>3</sup>. The hydrogen atoms were refined isotropically, and the heavy atoms were refined anisotropically. N-H and OH hydrogens were located from different electron density maps, and C-H hydrogens were placed in calculated positions and refined with a riding model. Data were corrected for the effects of absorption using SADABS<sup>4</sup>. Relevant crystal data and refinement results are summarized in Table 1.

Table S1 Crystal data and structure refinement for 1 and 2.

| Compound                            | 1                                                             | 2                                              |
|-------------------------------------|---------------------------------------------------------------|------------------------------------------------|
| CCDC                                | 1544883                                                       | 1548958                                        |
| Empirical formula                   | C <sub>3</sub> H <sub>2</sub> AgN <sub>5</sub> O <sub>6</sub> | C <sub>3</sub> AgN <sub>5</sub> O <sub>5</sub> |
| Formula weight                      | 311.97                                                        | 293.95                                         |
| Crystal system                      | monoclinic                                                    | monoclinic                                     |
| Space group                         | P2 <sub>1</sub> /c                                            | P2 <sub>1</sub> /c                             |
| a                                   | 10.346(2)                                                     | 10.1571(8)                                     |
| b                                   | 5.3225(11)                                                    | 4.9006(4)                                      |
| c                                   | 14.977(3)                                                     | 14.4249(11)                                    |
| $\alpha$                            | 90                                                            | 90                                             |
| $\beta$                             | 101.245(3)                                                    | 103.473(2)                                     |
| $\gamma$                            | 90                                                            | 90                                             |
| V                                   | 808.93(3)                                                     | 698.25(10)                                     |
| Z                                   | 4                                                             | 4                                              |
| D <sub>c</sub> (g/cm <sup>3</sup> ) | 2.545                                                         | 2.796                                          |
| T(K)                                | 205                                                           | 173                                            |
| $\mu$ (mm <sup>-1</sup> )           | 2.516                                                         | 2.896                                          |
| F(000)                              | 592.0                                                         | 560.0                                          |
| GOF on F                            | 1.099                                                         | 1.034                                          |
| R1[ $I > 2\sigma(I)$ ]              | 0.0333                                                        | 0.0251                                         |
| wR2[ $I > 2\sigma(I)$ ]             | 0.1089                                                        | 0.0594                                         |
| R1[all data]                        | 0.0373                                                        | 0.0297                                         |
| wR2(all data)                       | 0.1142                                                        | 0.0623                                         |

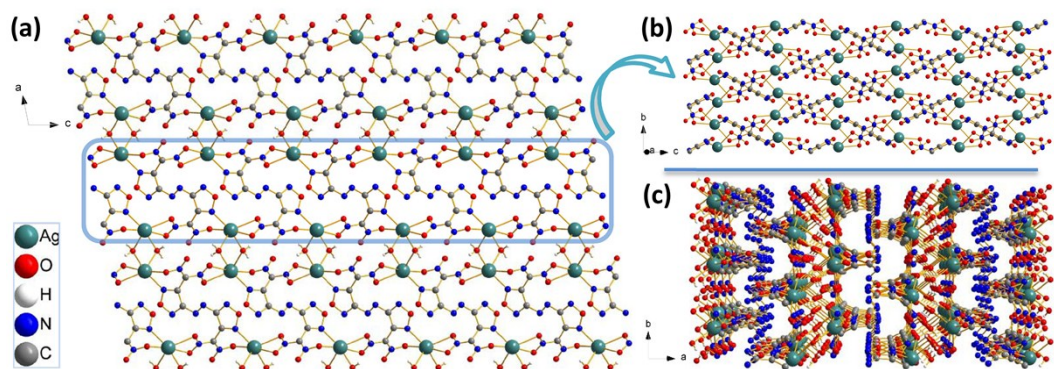

Figure S1 Compound 1: (a) 3-D frameworks seen along the b- axes; (b) a top perspective view of the 2D layers; (b) 2D layer in 2, and (c) The 3D network extended based on the chains along the c- axe

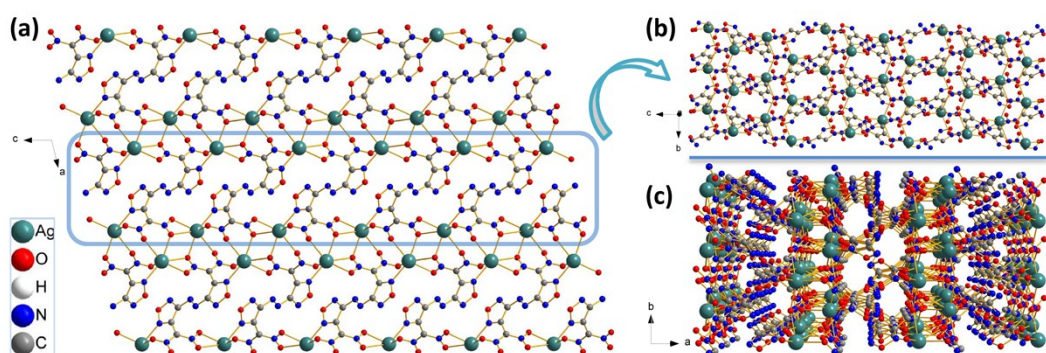

Figure S2 Compound 2: (a) 3-D frameworks seen along the b- axes; (b) a top perspective view of the 2D layers; (b) 2D layer in 2, and (c) The 3D network extended based on the chains along the c- axe

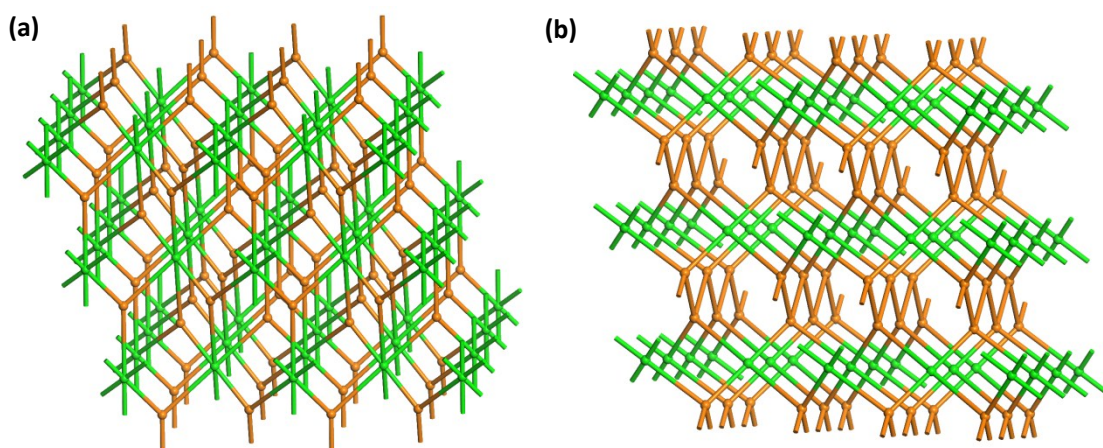

Figure S3 (a) the **bbf** topology of compound 1; (b) the **flu** topology of compound 2

Table S2 Bond lengths [Å] and angles [°] for compound 1

|          |          |                |            |
|----------|----------|----------------|------------|
| Ag1 - O1 | 2.411(2) | O1 - Ag1 - O1  | 87.85(5)   |
| Ag1 - O1 | 2.491(2) | O1 - Ag1 - O5  | 78.57(6)   |
| Ag1 - O5 | 2.593(2) | O1 - Ag1 - O5  | 84.58(7)   |
| Ag1 - O6 | 2.539(2) | O1 - Ag1 - O6  | 128.42(7)  |
| Ag1 - N1 | 2.357(2) | O1 - Ag1 - O6  | 85.38(7)   |
| O1 - Ag1 | 2.491(2) | O6 - Ag1 - O5  | 49.91(6)   |
| O1 - H1A | 0.8218   | N1 - Ag1 - O1  | 156.50(8)  |
| O1 - H1B | 0.8868   | N1 - Ag1 - O1  | 93.74(8)   |
| O2 - N1  | 1.388(3) | N1 - Ag1 - O5  | 118.73(8)  |
| O2 - N2  | 1.362(3) | N1 - Ag1 - O6  | 111.29(7)  |
| O3 - N4  | 1.255(3) | Ag1 - O1 - Ag1 | 128.75(9)  |
| O4 - N4  | 1.237(3) | Ag1 - O1 - H1A | 107.1      |
| O5 - Ag1 | 2.593(2) | Ag1 - O1 - H1A | 106.3      |
| O5 - N5  | 1.241(3) | Ag1 - O1 - H1B | 108.9      |
| O6 - Ag1 | 2.539(2) | Ag1 - O1 - H1B | 98         |
| O6 - N5  | 1.258(3) | H1A - O1 - H1B | 105.9      |
| N1 - C2  | 1.300(3) | N2 - O2 - N1   | 111.19(19) |
| N2 - C1  | 1.305(3) | N5 - O5 - Ag1  | 93.90(16)  |
| N3 - N3  | 1.259(4) | N5 - O6 - Ag1  | 96.08(15)  |
| N3 - C1  | 1.391(4) | O2 - N1 - Ag1  | 123.41(15) |
| N4 - C3  | 1.374(3) | C2 - N1 - Ag1  | 126.03(19) |
| N5 - C3  | 1.371(3) | C2 - N1 - O2   | 106.0(2)   |
| C1 - C2  | 1.431(4) | C1 - N2 - O2   | 105.2(2)   |
| C2 - C3  | 1.450(3) | N3 - N3 - C1   | 112.1(3)   |
|          |          | O3 - N4 - C3   | 116.3(2)   |
|          |          | O4 - N4 - O3   | 120.8(2)   |
|          |          | O4 - N4 - C3   | 122.9(2)   |
|          |          | O5 - N5 - O6   | 120.1(2)   |
|          |          | O5 - N5 - C3   | 123.9(2)   |
|          |          | O6 - N5 - C3   | 116.0(2)   |
|          |          | N2 - C1 - N3   | 117.9(2)   |
|          |          | N2 - C1 - C2   | 109.7(2)   |
|          |          | N3 - C1 - C2   | 132.2(2)   |
|          |          | N1 - C2 - C1   | 107.7(2)   |
|          |          | N1 - C2 - C3   | 124.2(3)   |
|          |          | C1 - C2 - C3   | 128.1(2)   |
|          |          | N4 - C3 - C2   | 120.6(2)   |
|          |          | N5 - C3 - N4   | 122.2(2)   |
|          |          | N5 - C3 - C2   | 116.8(2)   |

Table S3 Bond lengths [Å] and angles [°] for compound 2

|          |          |               |            |
|----------|----------|---------------|------------|
| Ag1 - O2 | 2.420(2) | O2 - Ag1 - O3 | 95.25(7)   |
| Ag1 - O3 | 2.471(2) | N1 - Ag1 - O2 | 105.02(8)  |
| Ag1 - N1 | 2.383(2) | N1 - Ag1 - O3 | 158.56(9)  |
| O5 - N5  | 1.258(3) | N2 - O1 - N1  | 110.5(2)   |
| O1 - N1  | 1.397(3) | N4 - O2 - Ag1 | 102.66(16) |
| O1 - N2  | 1.366(3) | N4 - O3 - Ag1 | 116.00(17) |
| O4 - N5  | 1.242(3) | N3 - N3 - C3  | 111.9(3)   |
| O2 - Ag1 | 2.420(2) | O2 - N4 - O3  | 120.4(2)   |
| O2 - N4  | 1.251(3) | O2 - N4 - C1  | 116.0(2)   |
| O3 - Ag1 | 2.471(2) | O3 - N4 - C1  | 123.5(3)   |
| O3 - N4  | 1.253(3) | O5 - N5 - C1  | 117.1(2)   |
| N3 - N3  | 1.255(5) | O4 - N5 - O5  | 121.1(2)   |
| N3 - C3  | 1.412(4) | O4 - N5 - C1  | 121.7(2)   |
| N4 - C1  | 1.379(3) | O1 - N1 - Ag1 | 124.46(17) |
| N5 - C1  | 1.385(3) | C2 - N1 - Ag1 | 128.7(2)   |
| N1 - C2  | 1.288(4) | C2 - N1 - O1  | 106.8(2)   |
| N2 - C3  | 1.303(4) | C3 - N2 - O1  | 105.4(2)   |
| C2 - C1  | 1.454(4) | N1 - C2 - C1  | 123.3(3)   |
| C2 - C3  | 1.442(4) | N1 - C2 - C3  | 107.3(2)   |
|          |          | C3 - C2 - C1  | 129.4(3)   |
|          |          | N4 - C1 - N5  | 121.2(2)   |
|          |          | N4 - C1 - C2  | 117.3(2)   |
|          |          | N5 - C1 - C2  | 121.2(2)   |
|          |          | N3 - C3 - C2  | 133.1(3)   |
|          |          | N2 - C3 - N3  | 116.9(2)   |
|          |          | N2 - C3 - C2  | 109.9(3)   |

## Thermal decomposition

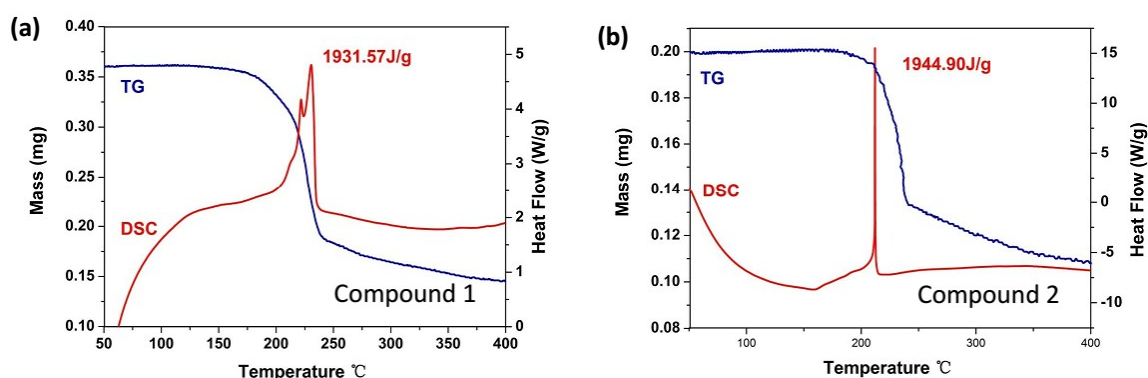

Figure S4 (a) DSC and TG curves of 1, (b) DSC and TG curves of 2.

The differential scanning calorimetry (DSC) and thermogravimetry (TG) curves were carried out to characterize the thermal stabilities of compound 1 and 2 with a linear heating rate of  $5\text{ }^{\circ}\text{C}\cdot\text{min}^{-1}$  in a nitrogen atmosphere (Fig. S4).

For compound 1, the DSC curve indicates that an intense exothermic process occurs at 218 °C, and ends at 235 °C with a peak temperature of 230 °C and the corresponding decomposition enthalpy of  $1931.57\text{ J}\cdot\text{g}^{-1}$ . For compound 2, the DSC curve indicates that a more intense exothermic process occurs at 211 °C, and ends at 212 °C with the corresponding decomposition enthalpy of  $1944.90\text{ J}\cdot\text{g}^{-1}$ . As shown in Fig. S4 (b), the sharp peak suggests that the process is very rapid owing to solvent-free MOF.

### Vibration spectroscopy

In the IR spectra (Fig. S5), it is cleared that there are coordinated water molecules in the compound 1, while, the compound 2 is solvent-free MOF.

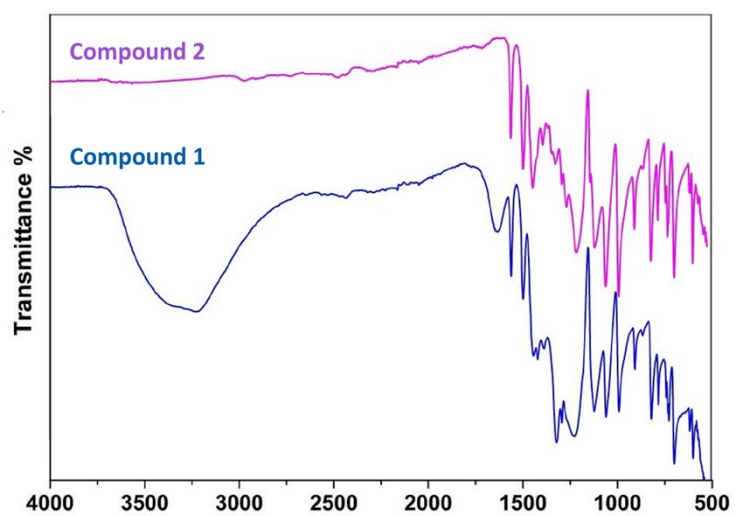

Figure S5 the IR curves of compound 1 (blue line) and 2 (purple line).



### Calculation of Detonation Properties

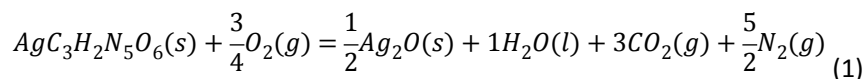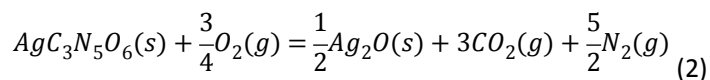

The combustion reaction of the complex 1 and 2 is equation (1) and (2), respectively.

The complete detonation reaction considered is described by equation (3) and (4), and the detonation properties are calculated by Kamlet-Jacobs equations<sup>5</sup> (5-7) as follows:

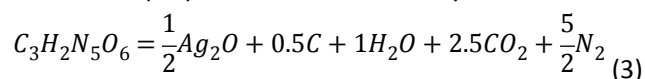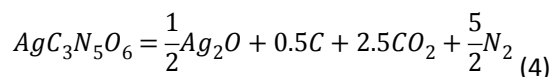

$$AgD = 1.01(N\bar{M}^{1/2}Q^{1/2})(1 + 1.30\rho) \quad (5)$$

$$P = 1.55\rho^2N\bar{M}^{1/2}Q^{1/2} \quad (6)$$

$$Q = \frac{-[\Delta H_f(\text{detonation products}) - \Delta H_f(\text{explosive})]}{M_w} \quad (7)$$

Where D is detonation velocity, P is detonation pressure, Q is heat of detonation, N is the number of moles of the gas generated per gram,  $\bar{M}$  is the average molecular weight of gaseous product, and  $\rho$  is crystal density.

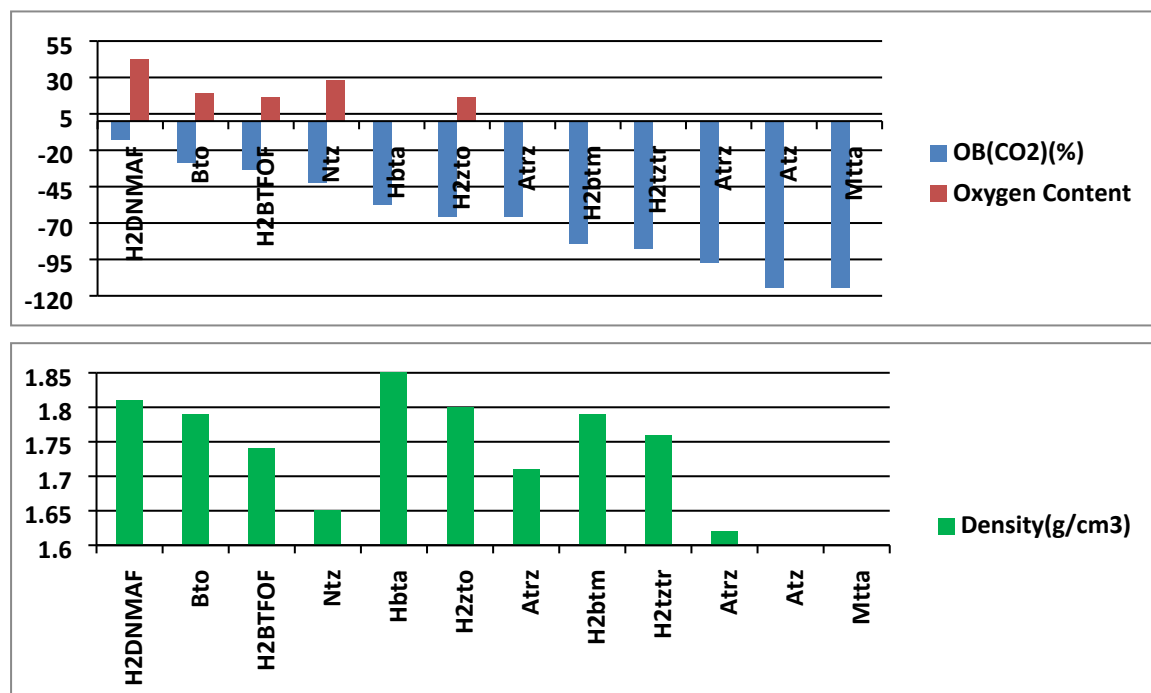

Figure S6 OB(CO<sub>2</sub>), oxygen content, and density of several ligands.

## REFERENCES

- 1 Y. Tang, C. He, L. A. Mitchell, D. A. P., and J. M. Shreeve, *Angew. Chem.*, 2016, 128, 5655-5657
- 2 SAINT v7.68A Bruker AXS inc.:Madison, WI (2009)
- 3 G. M. Sheldrick, SHELXL-2014/7, University of Gottingen, Germany (2014)
- 4 SADABS v2008/1 Bruker AXS Inc.: Madison, WI (2008)
- 5 M. J. Kamlet and S. T. Jacobs, *J. Chem. Phys.*, 1968, 48, 23-35
